# Supplementary material for: Expression of Epithelial-Mesenchymal Transition Proteins in Pancreatic Anaplastic (Undifferentiated) Carcinoma
Source: PubMed Central journal article supplement — Pancreas. 2018 Nov 17;48(1):36–42. doi: 10.1097/MPA.0000000000001199 (PMC6296839; doi:10.1097/mpa.0000000000001199), 2018-11-17
Supplement: mpa-48-36-s001.pdf [file mpa-48-36-s001.pdf]

# Tenascin-C, Fibronectin, and Tumor-Stroma Ratio in Pancreatic Ductal Adenocarcinoma

## SUPPLEMENTAL DIGITAL CONTENT

**SUPPLEMENTARY TABLE 1.** Associations Between Tenascin-C Expression, Fibronectin Expression, and Tumor-Stroma Ratio, and Clinicopathological Variables in 95 Pancreatic Ductal Adenocarcinoma Patients

| Variable                    | n/N   | Tenascin-C, n (%) |         |          | Fibronectin, n (%) |         |              | Tumor-stroma Ratio, n (%) |         |          |
|-----------------------------|-------|-------------------|---------|----------|--------------------|---------|--------------|---------------------------|---------|----------|
|                             |       | Low               | High    | <i>P</i> | Low                | High    | <i>P</i>     | Low                       | High    | <i>P</i> |
| pT                          |       |                   |         | 0.250    |                    |         | <b>0.045</b> |                           |         | 0.563    |
| T1                          | 6/95  | 6 (9)             | 0 (0)   |          | 6 (12)             | 0 (0)   |              | 3 (7)                     | 3 (6)   |          |
| T2                          | 30/95 | 22 (34)           | 8 (27)  |          | 17 (35)            | 13 (28) |              | 10 (24)                   | 20 (37) |          |
| T3                          | 52/95 | 33 (51)           | 19 (63) |          | 24 (49)            | 28 (61) |              | 24 (59)                   | 28 (52) |          |
| T4                          | 7/95  | 4 (6)             | 3 (10)  |          | 2 (4)              | 5 (11)  |              | 4 (10)                    | 3 (5)   |          |
| Lymph nodes*                |       |                   |         | 0.162    |                    |         | 0.262        |                           |         | 0.126    |
| Positive                    | 51/95 | 32 (50)           | 11 (37) |          | 24 (50)            | 19 (41) |              | 19 (46)                   | 32 (60) |          |
| Negative                    | 43/95 | 32 (50)           | 19 (63) |          | 24 (50)            | 27 (59) |              | 22 (54)                   | 21 (40) |          |
| Organ metastases            |       |                   |         | 0.479    |                    |         | 0.545        |                           |         | 0.559    |
| Positive                    | 11/95 | 58 (89)           | 26 (88) |          | 43 (88)            | 41 (89) |              | 5 (12)                    | 6 (11)  |          |
| Negative                    | 84/95 | 7 (11)            | 4 (13)  |          | 6 (12)             | 5 (11)  |              | 36 (88)                   | 48 (89) |          |
| Stage*                      |       |                   |         | 0.304    |                    |         | 0.136        |                           |         | 0.670    |
| I                           | 18/95 | 15 (23)           | 3 (10)  |          | 13 (27)            | 5 (11)  |              | 7 (17)                    | 11 (21) |          |
| II                          | 59/95 | 38 (59)           | 21 (70) |          | 27 (56)            | 32 (70) |              | 25 (61)                   | 34 (64) |          |
| III-IV                      | 17/95 | 11 (17)           | 6 (20)  |          | 8 (17)             | 9 (20)  |              | 9 (22)                    | 8 (15)  |          |
| Tumor size, mm <sup>†</sup> |       |                   |         | 0.163    |                    |         | 0.167        |                           |         | 0.124    |
| <30                         | 30/95 | 23 (36)           | 7 (23)  |          | 18 (38)            | 12 (26) |              | 10 (24)                   | 20 (38) |          |
| ≥30                         | 64/95 | 41 (64)           | 23 (77) |          | 30 (62)            | 34 (74) |              | 31 (76)                   | 33 (62) |          |
| Perineural invasion         |       |                   |         | 0.070    |                    |         | 0.303        |                           |         | 0.230    |
| Absent                      | 47/95 | 36 (55)           | 11 (37) |          | 26 (53)            | 21 (46) |              | 18 (44)                   | 29 (54) |          |
| Present                     | 48/95 | 29 (45)           | 19 (63) |          | 23 (47)            | 25 (54) |              | 23 (56)                   | 25 (46) |          |

Bold *P* values are statistically significant.

\*Lymph node status was unavailable for one patient.

<sup>†</sup>Tumor size was unavailable for one patient.

pT indicates pathological T.
